# Supplementary figures and images for: A Comprehensive Analysis to Elucidate the Effects of Spraying Mineral Elements on the Accumulation of Flavonoids in Epimedium sagittatum during the Harvesting Period
Source: MDPI journal article supplement (doi:10.3390/metabo13020294), 2023-02-16

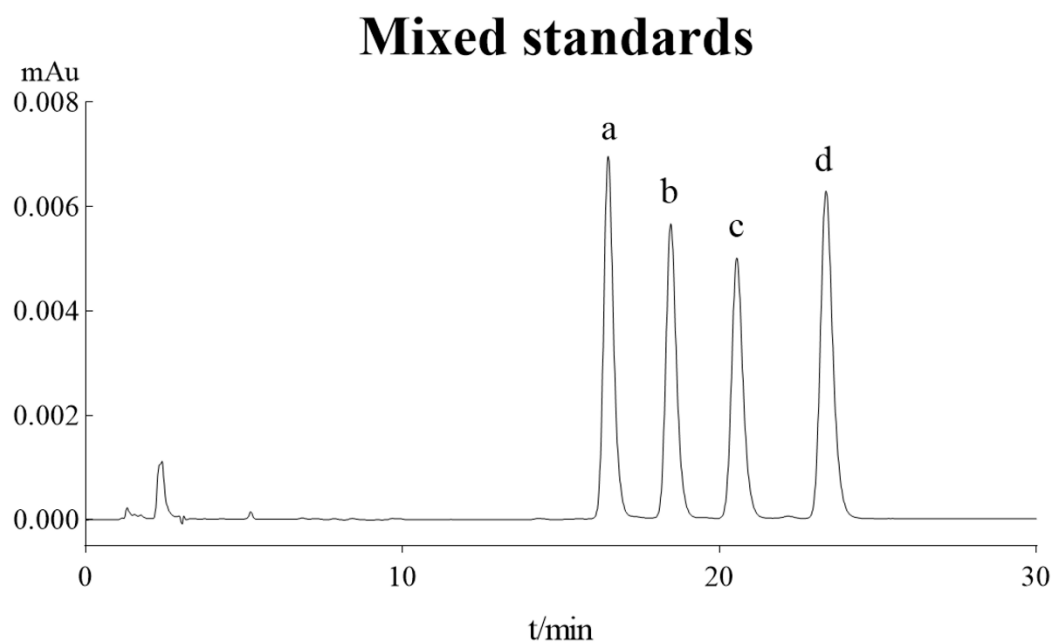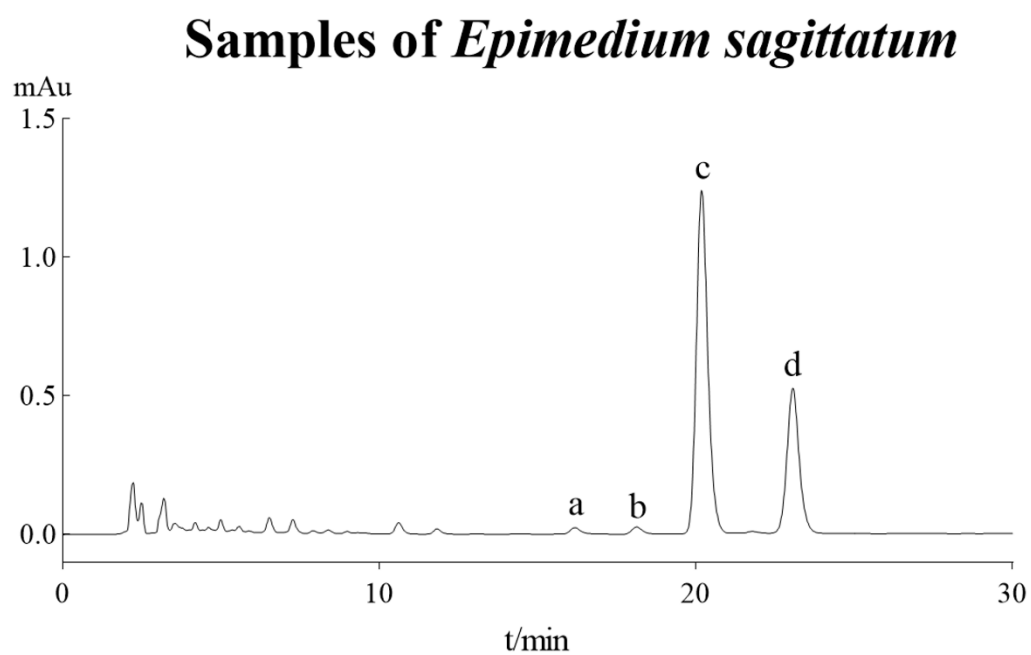

Figure S1. The chromatogram of the mixed standards and samples of *E. sagittatum*.

Supplement: s1 [file s1]
